# Supplementary material for: Effects of Different Forest Types on Stoichiometric Characteristics of Carbon, Nitrogen, and Phosphorus in Tropical Soils, China
Source: MDPI journal article supplement (doi:10.3390/su16020480), 2024-01-05
Supplement: s1 [file s1]

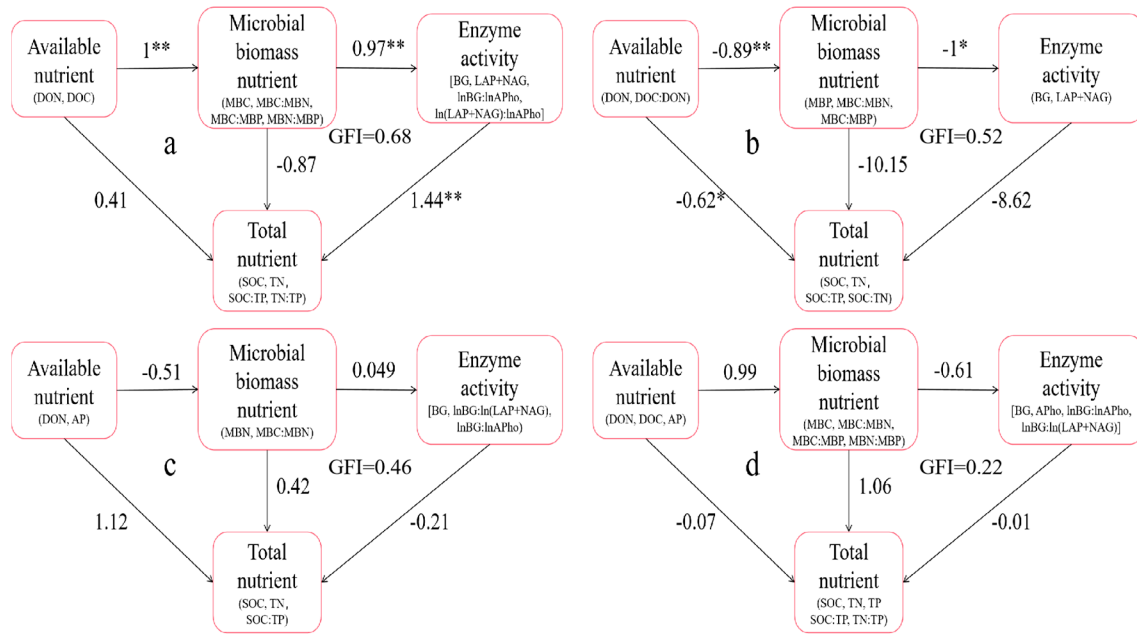

**Figure S1.** Structural equation model supplement diagram. [SEM analysis was carried out according to forest type. Primary forest (a), Secondary forest (b), *Dacrycarpus imbricatus* (c), *Pinus caribaea* Morelet (d).] \* represents  $p < 0.05$ , and \*\* represents  $p < 0.01$ .
